# Supplementary material
Source: publisher figshare collection journal article supplement (https://acs.figshare.com/ndownloader/files/21912381)
Supplement: Supplementary file 1 [file 21912381]

## Sheet: Biological Process
S6 Supplementary Table 6A: Go Term enrichment of Dsk1 substrates reported by Lipp (biological process)
Terms from the Process Ontology of gene_association.pombase with p-value <= 0.05
Gene Ontology term	Cluster frequency	Genome frequency	Corrected	FDR	FALSE	Genes annotated to the term
			P-value		Positives
RNA splicing, via transesterification reactions	17 of 131 genes, 13.0%	161 of 5400 genes, 3.0%	0.00019	0	0	SPAC16.02c, SPBC13E7.01, SPBP35G2.09, SPMIT.02, SPCC16C4.07, SPAC23A1.09, SPBC530.14c, SPAC19G12.07c, SPAC19A8.13, SPAC30D11.14c, SPCC825.05c, SPCC962.06c, SPCC162.01c, SPAC644.12, SPBC11C11.08, SPBC146.07, SPAC10F6.02c
RNA splicing	17 of 131 genes, 13.0%	168 of 5400 genes, 3.1%	0.00035	0	0	SPAC16.02c, SPBC13E7.01, SPBP35G2.09, SPMIT.02, SPCC16C4.07, SPAC23A1.09, SPBC530.14c, SPAC19G12.07c, SPAC19A8.13, SPAC30D11.14c, SPCC825.05c, SPCC962.06c, SPCC162.01c, SPAC644.12, SPBC11C11.08, SPBC146.07, SPAC10F6.02c
RNA splicing, via transesterification reactions with bulged adenosine as nucleophile	16 of 131 genes, 12.2%	156 of 5400 genes, 2.9%	0.00065	0	0	SPAC16.02c, SPBC13E7.01, SPBP35G2.09, SPCC16C4.07, SPAC23A1.09, SPBC530.14c, SPAC19G12.07c, SPAC19A8.13, SPAC30D11.14c, SPCC825.05c, SPCC962.06c, SPCC162.01c, SPAC644.12, SPBC11C11.08, SPBC146.07, SPAC10F6.02c
mRNA splicing, via spliceosome	16 of 131 genes, 12.2%	156 of 5400 genes, 2.9%	0.00065	0	0	SPAC16.02c, SPBC13E7.01, SPBP35G2.09, SPCC16C4.07, SPAC23A1.09, SPBC530.14c, SPAC19G12.07c, SPAC19A8.13, SPAC30D11.14c, SPCC825.05c, SPCC962.06c, SPCC162.01c, SPAC644.12, SPBC11C11.08, SPBC146.07, SPAC10F6.02c
mRNA processing	18 of 131 genes, 13.7%	196 of 5400 genes, 3.6%	0.00067	0	0	SPAC1D4.14, SPAC16.02c, SPBC13E7.01, SPBP35G2.09, SPCC16C4.07, SPAC23A1.09, SPBC530.14c, SPAC222.09, SPAC19G12.07c, SPAC19A8.13, SPAC30D11.14c, SPCC825.05c, SPCC962.06c, SPCC162.01c, SPAC644.12, SPBC11C11.08, SPBC146.07, SPAC10F6.02c
mRNA metabolic process	23 of 131 genes, 17.6%	310 of 5400 genes, 5.7%	0.00083	0	0	SPAC1D4.14, SPAC16.02c, SPBC13E7.01, SPBC16A3.18, SPBP35G2.09, SPAC6F12.16c, SPCC16C4.07, SPAC1687.22c, SPAC23A1.09, SPBC530.14c, SPCC736.12c, SPAC222.09, SPAC19G12.07c, SPAC19A8.13, SPAC30D11.14c, SPCC825.05c, SPCC962.06c, SPBC336.14c, SPCC162.01c, SPBC11C11.08, SPAC644.12, SPBC146.07, SPAC10F6.02c
cytoskeleton organization	18 of 131 genes, 13.7%	221 of 5400 genes, 4.1%	0.00385	0	0	SPAC1782.09c, SPCC895.07, SPBC18E5.07, SPBC11C11.02, SPAC20G8.05c, SPAC4F8.13c, SPAC24B11.11c, SPBC725.09c, SPAC1565.08, SPCC162.07, SPAC1F3.06c, SPAPB1A10.09, SPAC23A1.17, SPAC13A11.01c, SPBC211.03c, SPAC1093.06c, SPBC4F6.06, SPAC3G9.05
mRNA cis splicing, via spliceosome	13 of 131 genes, 9.9%	129 of 5400 genes, 2.4%	0.00913	0	0	SPAC16.02c, SPAC30D11.14c, SPBC13E7.01, SPBP35G2.09, SPCC962.06c, SPCC825.05c, SPCC162.01c, SPBC11C11.08, SPAC644.12, SPAC23A1.09, SPBC146.07, SPAC19G12.07c, SPAC19A8.13
endoplasmic reticulum localization involved in endoplasmic reticulum polarization at cell division site	3 of 131 genes, 2.3%	3 of 5400 genes, 0.1%	0.0107	0	0	SPAC24B11.11c, SPAC20G8.05c, SPAC1565.08
protein localization to cell division site involved in cytokinesis, actomyosin contractile ring assembly	3 of 131 genes, 2.3%	3 of 5400 genes, 0.1%	0.0107	0	0	SPBC11C11.02, SPAC20G8.05c, SPAC4F8.13c
protein localization to cell division site involved in mitotic actomyosin contractile ring assembly	3 of 131 genes, 2.3%	3 of 5400 genes, 0.1%	0.0107	0	0	SPBC11C11.02, SPAC20G8.05c, SPAC4F8.13c
biological regulation	58 of 131 genes, 44.3%	1482 of 5400 genes, 27.4%	0.01639	0.0033	0.04	SPAC1782.09c, SPCC1281.05, SPCC895.07, SPBC16A3.08c, SPBC16A3.18, SPBC1D7.02c, SPAC1639.02c, SPCC1682.02c, SPBC11C11.02, SPCC736.15, SPCP1E11.04c, SPAC3G6.01, SPAC6F12.16c, SPBC1A4.03c, SPAC24B11.11c, SPCC16C4.07, SPAC1687.22c, SPAC23A1.09, SPAC19G12.07c, SPBC725.09c, SPCC1183.11, SPAC1A6.09c, SPBC31F10.09c, SPBC336.14c, SPAC23G3.01, SPAPB1A10.09, SPAC57A7.12, SPBC16E9.02c, SPCC70.05c, SPAC13A11.…
actin cytoskeleton organization	13 of 131 genes, 9.9%	138 of 5400 genes, 2.6%	0.019	0.0031	0.04	SPCC162.07, SPAC1782.09c, SPBC18E5.07, SPBC11C11.02, SPAC20G8.05c, SPAC4F8.13c, SPAC24B11.11c, SPAC13A11.01c, SPAC23A1.17, SPBC211.03c, SPBC4F6.06, SPBC725.09c, SPAC3G9.05
actin filament-based process	13 of 131 genes, 9.9%	141 of 5400 genes, 2.6%	0.02393	0.0029	0.04	SPCC162.07, SPAC1782.09c, SPBC18E5.07, SPBC11C11.02, SPAC20G8.05c, SPAC4F8.13c, SPAC24B11.11c, SPAC13A11.01c, SPAC23A1.17, SPBC211.03c, SPBC4F6.06, SPBC725.09c, SPAC3G9.05
endoplasmic reticulum polarization	3 of 131 genes, 2.3%	4 of 5400 genes, 0.1%	0.04206	0.0093	0.14	SPAC24B11.11c, SPAC20G8.05c, SPAC1565.08
transitional endoplasmic reticulum polarization at cell division site	3 of 131 genes, 2.3%	4 of 5400 genes, 0.1%	0.04206	0.0088	0.14	SPAC24B11.11c, SPAC20G8.05c, SPAC1565.08

## Sheet: Molecular Function
S6 Supplementary Table 6B: Go Term enrichment of Dsk1 substrates reported by Lipp (molecular function)
Terms from the Function Ontology of gene_association.pombase with p-value <= 0.05
Gene Ontology term	Cluster frequency	Genome frequency	Corrected	FDR	FALSE	Genes annotated to the term
			P-value		Positives
mRNA binding	13 of 131 genes, 9.9%	78 of 5400 genes, 1.4%	4.66e-06	0	0	SPAC1D4.14, SPAC17C9.03, SPAC16.02c, SPBC16A3.18, SPBP35G2.09, SPCC613.05c, SPAC806.03c, SPAC23A1.09, SPBC146.07, SPAC1687.22c, SPCC736.12c, SPAC19G12.07c, SPAC19A8.13
RNA binding	35 of 131 genes, 26.7%	735 of 5400 genes, 13.6%	0.00623	0	0	SPBC16A3.08c, SPBC16A3.18, SPBP35G2.09, SPBC18H10.04c, SPCC613.05c, SPAC6F12.16c, SPCC16C4.07, SPAC1687.22c, SPAC23A1.09, SPAC25G10.01, SPAC19G12.07c, SPCC1795.11, SPAC1565.05, SPCC962.06c, SPBC336.14c, SPAC806.03c, SPAC23G3.01, SPBC146.07, SPAC10F6.02c, SPBC29A3.04, SPAC1D4.14, SPAC16.02c, SPBC13E7.01, SPMIT.02, SPCC417.08, SPCC1322.01, SPCC736.12c, SPAC222.09, SPAC19A8.13, SPAC31A2.07c, SPAC17C…
protein binding	49 of 131 genes, 37.4%	1205 of 5400 genes, 22.3%	0.00783	0	0	SPAC1782.09c, SPCC895.07, SPBC11C11.02, SPCP1E11.04c, SPAC3G6.01, SPBC1A4.03c, SPAC24B11.11c, SPAC30.01c, SPCC297.05, SPBC1215.01, SPAC19G12.07c, SPBC725.09c, SPCC1795.11, SPCC162.07, SPAC57A10.03, SPAC23G3.01, SPBC16H5.02, SPAC644.12, SPAC57A7.12, SPAPB1A10.09, SPBC146.07, SPBC16E9.02c, SPCC70.05c, SPAC13A11.01c, SPAC23A1.17, SPBC211.03c, SPAC3G9.05, SPAC29B12.01, SPAC16.02c, SPAC631.02, SPAC20G…
pre-mRNA binding	4 of 131 genes, 3.1%	13 of 5400 genes, 0.2%	0.02913	0.025	0.1	SPBC146.07, SPBP35G2.09, SPCC736.12c, SPCC962.06c
U1 snRNA binding	3 of 131 genes, 2.3%	6 of 5400 genes, 0.1%	0.03862	0.02	0.1	SPCC16C4.07, SPBP35G2.09, SPAC19A8.13
nucleic acid binding	44 of 131 genes, 33.6%	1110 of 5400 genes, 20.6%	0.04297	0.02	0.12	SPCC1281.05, SPBC16A3.08c, SPBC16A3.18, SPBP35G2.09, SPBC1D7.02c, SPBC18H10.04c, SPCC613.05c, SPCC1682.02c, SPAC3G6.01, SPAC6F12.16c, SPBC1A4.03c, SPCC16C4.07, SPAC1687.22c, SPAC23A1.09, SPAC25G10.01, SPAC19G12.07c, SPCC1795.11, SPAC1565.05, SPCC962.06c, SPBC336.14c, SPAC806.03c, SPAC23G3.01, SPAPB1E7.03, SPAC644.12, SPBC146.07, SPAC10F6.02c, SPBC29A3.04, SPAC1D4.14, SPAC29B12.01, SPAC16.02c, SPB…

## Sheet: Cellular component
S6 Supplementary Table 6C: Go Term enrichment of Dsk1 substrates reported by Lipp (cellular component)
Terms from the Component Ontology of gene_association.pombase with p-value <= 0.05
Gene Ontology term	Cluster frequency	Genome frequency	Corrected	FDR	FALSE	Genes annotated to the term
			P-value		Positives
ribonucleoprotein complex	34 of 131 genes, 26.0%	642 of 5400 genes, 11.9%	0.00104	0	0	SPAC13G6.02c, SPAPB8E5.06c, SPBC16A3.18, SPAC1142.04, SPBP35G2.09, SPBC18H10.04c, SPCC613.05c, SPCC16C4.07, SPBC2D10.08c, SPAC227.02c, SPAC25G10.01, SPAC19G12.07c, SPCC1795.11, SPAC1565.05, SPCC825.05c, SPCC962.06c, SPAC57A10.03, SPBC336.14c, SPAC806.03c, SPAC644.12, SPAC57A7.12, SPBC146.07, SPBP22H7.08, SPAC10F6.02c, SPBC29A3.04, SPBC13E7.01, SPCC736.12c, SPBC2F12.04, SPAC19A8.13, SPAC664.05, SP…
cortical cytoskeleton	12 of 131 genes, 9.2%	116 of 5400 genes, 2.1%	0.00362	0	0	SPCC162.07, SPAC1782.09c, SPBC11C11.02, SPAC20G8.05c, SPCC736.15, SPAC4F8.13c, SPAC24B11.11c, SPAPB1A10.09, SPAC23A1.17, SPBC725.09c, SPAC1093.06c, SPAC3G9.05
cell cortex	16 of 131 genes, 12.2%	215 of 5400 genes, 4.0%	0.00971	0	0	SPAC1782.09c, SPBC11C11.02, SPAC20G8.05c, SPCC736.15, SPAC4F8.13c, SPCP1E11.04c, SPAC24B11.11c, SPAC30.01c, SPBC725.09c, SPAC110.01, SPCC162.07, SPAPB1A10.09, SPAC23A1.17, SPAC13A11.01c, SPAC1093.06c, SPAC3G9.05
cytoplasmic region	16 of 131 genes, 12.2%	215 of 5400 genes, 4.0%	0.00971	0	0	SPAC1782.09c, SPBC11C11.02, SPAC20G8.05c, SPCC736.15, SPAC4F8.13c, SPCP1E11.04c, SPAC24B11.11c, SPAC30.01c, SPBC725.09c, SPAC110.01, SPCC162.07, SPAPB1A10.09, SPAC23A1.17, SPAC13A11.01c, SPAC1093.06c, SPAC3G9.05
commitment complex	4 of 131 genes, 3.1%	10 of 5400 genes, 0.2%	0.01116	0	0	SPBC146.07, SPBP35G2.09, SPCC962.06c, SPAC19A8.13
spliceosomal complex	11 of 131 genes, 8.4%	121 of 5400 genes, 2.2%	0.02669	0	0	SPBC13E7.01, SPBC16A3.18, SPBP35G2.09, SPCC962.06c, SPCC825.05c, SPAC57A10.03, SPAC644.12, SPBC146.07, SPAC19G12.07c, SPAC10F6.02c, SPAC19A8.13
cell cortex part	14 of 131 genes, 10.7%	194 of 5400 genes, 3.6%	0.04054	0	0	SPCC162.07, SPAC1782.09c, SPBC11C11.02, SPAC20G8.05c, SPCC736.15, SPAC4F8.13c, SPCP1E11.04c, SPAC24B11.11c, SPAPB1A10.09, SPAC13A11.01c, SPAC23A1.17, SPBC725.09c, SPAC1093.06c, SPAC3G9.05
cell division site part	11 of 131 genes, 8.4%	129 of 5400 genes, 2.4%	0.04717	0	0	SPAC1782.09c, SPBC11C11.02, SPAC20G8.05c, SPAC4F8.13c, SPCP1E11.04c, SPAC24B11.11c, SPAPB1A10.09, SPAC13A11.01c, SPBC725.09c, SPBC4F6.06, SPAC3G9.05
